# Supplementary material for: An advanced self-powered visible-light photodetector based on the asymmetric Au/CsPbBr 3 /SmB 6 junction
Source: Royal Society of Chemistry journal article supplement (doi:10.1039/d4tc03510k), 2024-01-01
Supplement: d4tc03510k1.pdf [file d4tc03510k1.pdf]

***(Supporting Information)***

**Advanced Self-powered Visible-light Photodetector Based on Asymmetric  
Au/CsPbBr<sub>3</sub>/SmB<sub>6</sub> Junction**

Zairan Liu <sup>a</sup>, Gang Cao <sup>a</sup>, Zhaozhi Guan <sup>a</sup>, Yan Tian <sup>a</sup>, Jidong Liu <sup>a</sup>, Jun Chen <sup>a</sup>, Shaozhi Deng <sup>a,\*</sup>, Fei Liu <sup>a,\*</sup>

<sup>a</sup>State Key Laboratory of Optoelectronic Materials and Technologies, Guangdong Province Key Laboratory of Display Material and Technology, School of Electronics and Information Technology, Sun Yat-sen University, Guangzhou, 510275, People's Republic of China

\*Corresponding email: [liufei@mail.sysu.edu.cn](mailto:liufei@mail.sysu.edu.cn), [stsdz@mail.sysu.edu.cn](mailto:stsdz@mail.sysu.edu.cn)

Electronic Supplementary Information (ESI) available: [details of any supplementary information available should be included here]. See DOI: 10.1039/x0xx00000x

## 1. Measurement of the work function of the samples

To conduct the band alignment in the CsPbBr<sub>3</sub>/SmB<sub>6</sub>, KPFM technique was used to measure the surface work function of SmB<sub>6</sub> and CsPbBr<sub>3</sub>, as presented in Fig. S1(a,b). By calculating the contact potential difference (CPD) between sample and AFM tip, the work function of CsPbBr<sub>3</sub> and SmB<sub>6</sub> can be respectively obtained to be 4.3 eV and 4.75 eV based on the equations of  $\Phi_{SmB_6} = \Phi_{tip1} + CPD_{SmB_6}$  and  $\Phi_{CsPbBr_3} = \Phi_{tip2} + CPD_{CsPbBr_3}$ , where  $\Phi_{tip1}=5$  eV and  $\Phi_{tip2}=4.3$  eV are the work functions of AFM tip 1 and 2, and  $CPD_{CsPbBr_3}=0.45$  eV and  $CPD_{SmB_6}=-0.7$  eV are the contact potential differences between sample and AFM tip. The as-measured work functions of the CsPbBr<sub>3</sub> (4.75 eV) and SmB<sub>6</sub> (4.3 eV) are also in good agreement with the reported results in previous works.<sup>3-5</sup>

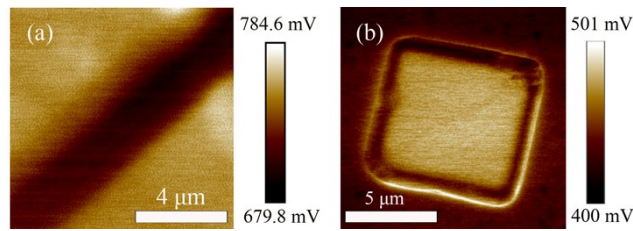

Fig. S1 KPFM characterizations of the as-grown (a) SmB<sub>6</sub> nanobelt and (b) CsPbBr<sub>3</sub> microsheet, respectively.

## 2. Electric transport behaviors of the field effect transistor based on CsPbBr<sub>3</sub> or SmB<sub>6</sub>

The transfer characteristic curves of the SmB<sub>6</sub> nanobelt at different  $V_{ds}$  are shown in Fig. S2(a), where  $I_{ds}$  represents the drain-source current,  $V_g$  is the gate voltage and  $V_{ds}$  stands for the drain-source voltage. It is clearly seen that  $I_{ds}$  nearly keeps unvaried with  $V_g$  when  $V_{ds}$  is 0.2 V, proving that the transport behaviors of SmB<sub>6</sub> is almost independent on the gate voltage and it has metallic behaviors. Subsequently, Figure S2(b) gives the transfer curves of the FET device based on CsPbBr<sub>3</sub> microsheet at the drain-source voltage of -2 V. From the transfer curves of the FET, the CsPbBr<sub>3</sub> microsheet can be determined to have p-type conductive behaviors and the average hole carrier mobility is about  $0.4 \text{ cm}^2 \text{ V}^{-1} \text{ s}^{-1}$ .

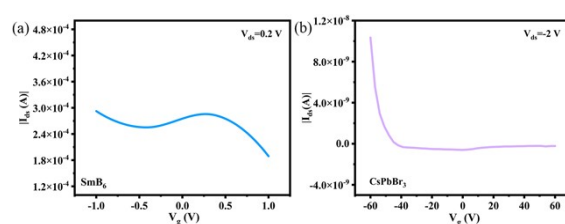

Fig. S2 transfer characteristic curves of the FETs based on (a) SmB<sub>6</sub> nanobelt (b) CsPbBr<sub>3</sub> microsheet, respectively.

### 3. PL decay behaviors of the CsPbBr<sub>3</sub> and CsPbBr<sub>3</sub>/SmB<sub>6</sub> samples

Typical time-resolved PL spectra of a CsPbBr<sub>3</sub> microsheet and CsPbBr<sub>3</sub>/SmB<sub>6</sub> Schottky junction are given in Figure S3 to study the electron-hole population behaviors under 405-nm pulsed irradiation. It is known that the PL decay curve can be regarded as a superposition of fast and slow dynamic components, which should exhibit the time-dependent biexponential behaviors. Accordingly, the PL decay equation can be written as  $f(t) = f_1 e^{-t/\tau_1} + f_2 e^{-t/\tau_2}$ ,<sup>6,7</sup> where  $f_1$  and  $f_2$  are the constants reflecting the distribution coefficients,  $t$  is the diffusion time of the exciton, and  $\tau_1$  and  $\tau_2$  denote the decay lifetimes of surface exciton and bulk exciton, respectively. Based on Fig. S3, the characteristic fluorescence lifetimes of  $\tau_1$  and  $\tau_2$  are respectively calculated to be 3.6 ns and 5.7 ns for bare CsPbBr<sub>3</sub> microsheet, which are clearly longer than those (1.4 ns and 3.5 ns) for CsPbBr<sub>3</sub>/SmB<sub>6</sub> Schottky junction. Also, the mean fluorescence lifetime ( $\tau_{ave}$ ) can be worked out by the expression of  $\tau_{ave} = \sum f_i \tau_i^2 / \sum f_i \tau_i$ ,<sup>6,7</sup> where  $f_i$  is the distribution coefficient constant and  $t_i$  represents the decay time constant. By this way,  $\tau_{ave}$  is deduced to be respectively 3.6 ns and 2.56 ns for bare CsPbBr<sub>3</sub> microsheet and CsPbBr<sub>3</sub>/SmB<sub>6</sub> junction, suggesting that the recombination efficiency of the electron-hole pairs is greatly reduced while their separation efficiency is remarkably enhanced due to the existence of Schottky junction.

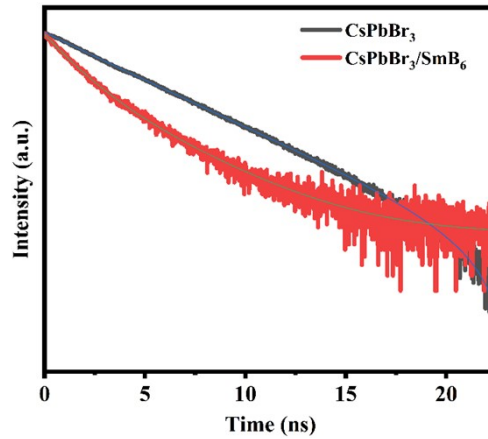

Fig. S3 Typical PL decay curves and biexponential fitting results for the CsPbBr<sub>3</sub> microsheet and CsPbBr<sub>3</sub>/SmB<sub>6</sub> junction under 405-nm pulsed irradiation, respectively.

#### 4. HRTEM characterization of the CsPbBr<sub>3</sub>/SmB<sub>6</sub> Schottky junction

Low- and high-resolution transmission electron microscope images of the as-grown CsPbBr<sub>3</sub>/SmB<sub>6</sub> hybrid structure are presented in Fig. S4 (a, b). One can clearly see that the interlayer spacings are respectively 0.42 nm and 0.41 nm for CsPbBr<sub>3</sub> microsheet and SmB<sub>6</sub> nanobelt, indexed as the (1 1 0) and (1 0 0) crystal planes according to the Joint Committee on Powder Diffraction Standards (JCPDS) cards of Nos. 18-0364 and 36-1326. The EDX result of the Schottky junction is demonstrated in Fig. S4(c), in which Cs, Pb, Br, Sm, and B elements coexisted in the EDX spectrum, revealing the successful formation of the CsPbBr<sub>3</sub>/SmB<sub>6</sub> Schottky junction.

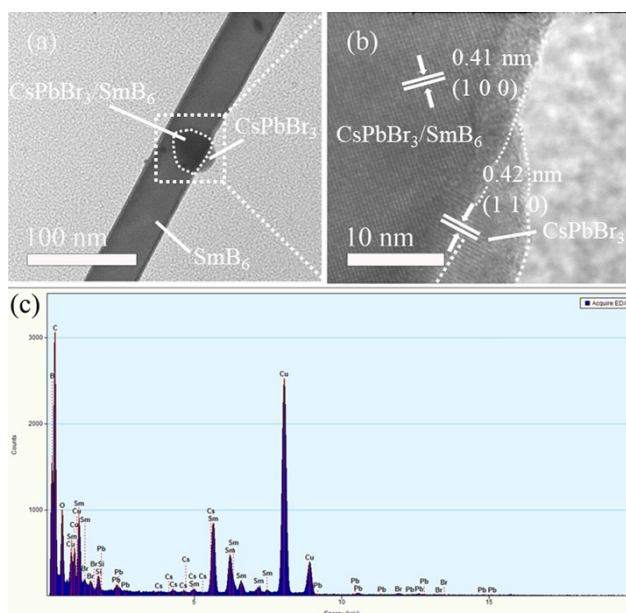

Fig. S4 TEM characterization of the CsPbBr<sub>3</sub>/SmB<sub>6</sub> Schottky junction. (a, b) Low- and high-magnification TEM images of CsPbBr<sub>3</sub>/SmB<sub>6</sub>. (c) EDX spectrum of the CsPbBr<sub>3</sub>/SmB<sub>6</sub> junction.

## 5. Photosensitive behaviors of pristine Au/SmB<sub>6</sub>/Au device

Figure S5(a) shows the current-voltage curve of pristine Au/SmB<sub>6</sub>/Au nanobelt device under dark and light conditions, and the inset gives the corresponding optical image. By traditional photolithography, pattern Au film with a thickness of 100 nm was deposited on both sides of individual SmB<sub>6</sub> nanobelt as the electrodes, in which their interspacing was about 3  $\mu\text{m}$ . As seen in Fig. S5(a), the I-V curves almost coincide with each other under dark and 514-nm illumination. Also, the time-resolved photoresponse behaviors of the 0.1 V-biased Au/SmB<sub>6</sub>/Au under 514-nm irradiation is presented in Fig. S5(b). It is clearly seen that the I-t curve is almost the straight line, unveiling no obvious photoresponse occurs for pristine Au/SmB<sub>6</sub>/Au nanobelt and the photosensitive behaviors are absent due to its metal nature.

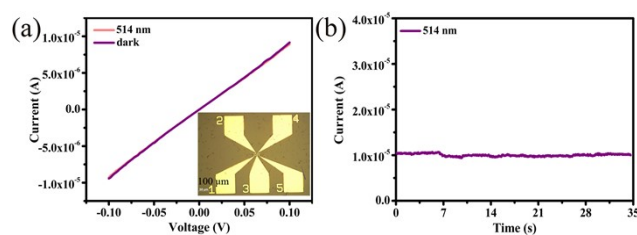

Fig. S5 Photosensitive performances of Au/SmB<sub>6</sub>/Au device. (a) The current-voltage curves of Au/SmB<sub>6</sub>/Au device under 514-nm light and dark conditions, respectively. The inset gives the optical image of individual Au/SmB<sub>6</sub>/Au device. (b) Time-response of the 0.1 V-biased Au/SmB<sub>6</sub>/Au device under 514-nm irradiation with a power density of 0.5 mW/cm<sup>2</sup>.

## Summary table of the photosensitive performances of biased photodetectors based on perovskite

**Table SI** Summary table of the device performances of perovskite-based photodetectors at biased voltage

| Photodetectors                                           | Voltage (V) | Responsivity (A/W) | On/off time (ms)           | Specific detectivity (Jones) | EQE (%)     | Ref.             |
|----------------------------------------------------------|-------------|--------------------|----------------------------|------------------------------|-------------|------------------|
| Au/CsPbBr <sub>3</sub> /Au                               | 3           | 0.18               | 1.0/1.8                    | 6.1×10 <sup>10</sup>         | N/A         | 8                |
| Au/CsPbBr <sub>3</sub> /Au                               | 5           | 2.776              | 40/20                      | N/A                          | 1254        | 9                |
| Au/CsPbBr <sub>3</sub> /Au                               | 5           | 0.028              | <100                       | 1.8×10 <sup>11</sup>         | 7           | 10               |
| Au/CsPbBr <sub>3</sub> @FDTS/Au                          | 5           | 0.0136             | N/A                        | 7.75×10 <sup>10</sup>        | N/A         | 11               |
| Au/CsPbBr <sub>3</sub> (mp-TiO <sub>2</sub> )/Au         | 4           | 3.5                | 9000                       | N/A                          | N/A         | 12               |
| ITO/CsPbBr <sub>3</sub> /GaN/Ni/Al                       | 10          | 1.78               | 6.6×10 <sup>-5</sup> /0.02 | 6.5×10 <sup>13</sup>         | 18.7        | 13               |
| In/CsPbBr <sub>3</sub> /ZnO/In                           | -5          | 0.00063            | 0.061/1.4                  | 7×10 <sup>9</sup>            | N/A         | 14               |
| Au/CH <sub>3</sub> NH <sub>3</sub> PbCl <sub>3</sub> /Ag | 30          | 0.24               | 0.1/2                      | 1.1×10 <sup>11</sup>         | 73          | 15               |
| <b>Au/CsPbBr<sub>3</sub>/Au</b>                          | <b>4</b>    | <b>0.029</b>       | <b>176/80</b>              | <b>2.6×10<sup>10</sup></b>   | <b>7</b>    | <b>This work</b> |
| <b>Au/CsPbBr<sub>3</sub>/SmB<sub>6</sub></b>             | <b>4</b>    | <b>4.53</b>        | <b>42/24</b>               | <b>3.36×10<sup>10</sup></b>  | <b>1095</b> | <b>This work</b> |

## Supplementary Reference

1. Y. Rosenwaks, R. Shikler, T. Glatzel and S. Sadewasser, *Phys. Rev. B*, 2004, **70**, 085320.
2. X. Wan, E. Chen, J. Yao, M. Gao, X. Miao, S. Wang, Y. Gu, S. Xiao, R. Zhan, K. Chen, Z. Chen, X. Zeng, X. Gu and J. Xu, *Acs Nano*, 2021, **15**, 20319-20331.
3. X. Zeng, S. Li, Z. Liu, Y. Chen, J. Chen, S. Deng, F. Liu and J. She, *Nanomaterials*, 2022, **12**, 4205.
4. F. Zhao, Y. X. Guo, X. Wang, J. H. Tao, J. C. Jiang, Z. G. Hu and J. H. Chu, *Sol. Energy*, 2019, **191**, 263-271.
5. H. Li, Z. P. Li, S. S. Liu, M. Li, X. Y. Wen, J. Lee, S. Lin, M. Y. Li and H. F. Lu, *J. Alloy Compd.*, 2022, **895**, 162570.
6. Z. Shi, S. Li, Y. Li, H. Ji, X. Li, D. Wu, T. Xu, Y. Chen, Y. Tian, Y. Zhang, C. Shan and G. Du, *Acs Nano*, 2018, **12**, 1462-1472.
7. Y. He, L. Matej, H. J. Jung, K. M. McCall, M. Chen, C. C. Stoumpos, Z. Liu, J. A. Peters, D. Y. Chung, B. W. Wessels, M. R. Wasielewski, V. P. Dravid, A. Burger and M. G. Kanatzidis, *Nat. Commun.*, 2018, **9**, 1609.
8. X. Li, D. Yu, F. Cao, Y. Gu, Y. Wei, Y. Wu, J. Song and H. Zeng, *Adv. Funct. Mater.*, 2016, **26**, 5903-5912.
9. W. Zheng, X. Xiong, R. Lin, Z. Zhang, C. Xu and F. Huang, *Acs Appl. Mater. Inter.*, 2018, **10**, 1865-1870.
10. J. Ding, S. Du, Z. Zuo, Y. Zhao, H. Cui and X. Zhan, *J. Phys. Chem. C*, 2017, **121**, 4917-4923.
11. T. Shi, X. Chen, R. He, H. Huang, X. Yuan, Z. Zhang, J. Wang, P. K. Chu and X.-F. Yu, *Adv. Sci.*, 2023, **10**, 2302005.
12. L. Zhou, K. Yu, F. Yang, J. Zheng, Y. Zuo, C. Li, B. Cheng and Q. Wang, *Dalton T.*, 2017, **46**, 1766-1769.
13. L. Su, Y. Zhang and J. Xie, *J. Mater. Chem. C*, 2022, **10**, 1349-1356.
14. L. Su, T. Li and Y. Zhu, *Opt. Express*, 2022, **30**, 23330-23340.
15. J. Yu, J. Zheng, N. Tian, L. Li, Y. Qu, Y. Huang, Y. Luo and W. Tan, *Rsc Adv.*, 2022, **12**, 23578-23583.
